# Occupational Inflexibility and Women's Employment During the Transition to Parenthood

Patrick Ishizuka and Kelly Musick

**ABSTRACT** The typical U.S. workplace has adapted little to changes in the family and remains bound to norms of a workweek of 40 or more hours. How jobs are structured and remunerated within occupations shapes gender inequality in the labor market, and this may be particularly true at the critical juncture of parenthood. This study provides novel evidence showing how the inflexibility of occupational work hours shapes new mothers' employment. We use a fixed-effects approach and individual-level data from nationally representative panels of the Survey of Income and Program Participation ( $N=2,239$  women) merged with occupational characteristics from the American Community Survey. We find that women in pre-birth occupations with higher shares working 40 or more hours per week and higher wage premiums to longer work hours are significantly less likely to be employed post-birth. These associations are small in magnitude and not statistically significant for men, and placebo regressions with childless women show no associations between occupational inflexibility and subsequent employment. Results illustrate how individual employment decisions are jointly constrained by the structure of the labor market and persistent gendered cultural norms about breadwinning and caregiving.

**KEYWORDS** Gender • Parenthood • Occupations • Employment

## Introduction

Men's and women's employment patterns diverge following parenthood, with important consequences for gender inequality in the labor market. Whereas men's labor supply remains stable or increases when they become fathers, women's employment and work hours decline significantly (Byker 2016a; Damaske and Frech 2016; Killewald and Zhou 2019; Lu et al. 2017; Lundberg and Rose 2002; Musick et al. 2020). Reductions in mothers' cumulative work experience due to employment gaps, in turn, account for a large portion of both the motherhood wage penalty and gender wage gap (Aisenbrey et al. 2009; Blau and Kahn 2017; Budig and England 2001; Gangl and Ziefle 2009). Even short work interruptions can result in substantial long-term wage and career costs (Bertrand et al. 2010; England et al. 2016). Parenthood-related gaps in employment are penalized in hiring (Weisshaar 2018), and work adjustments following birth appear to have long-lasting effects on gender specialization in paid and unpaid work (Byker

2016b; Patnaik 2019; Rege and Solli 2013). Thus, despite the narrowing of human capital gaps between men and women (DiPrete and Buchmann 2006; Goldin 2006), men continue to earn more than women, and gender gaps in earnings widen over the life course (Goldin 2014). Identifying factors that shape women's employment responses to parenthood is crucial for understanding gender inequality in the labor market.

Goldin (2014) argued that the "last chapter" in the long progression to gender equality in employment and earnings is in changing how jobs are structured and remunerated to allow for flexibility in work hours. She showed that this change has taken off in some high-earning occupations but not others, and she linked indicators of job hours inflexibility within occupations to greater gender gaps in pay. Relative to those of other advanced industrialized countries, U.S. workplaces have adapted little to changes in the family and remain bound to norms of a full-time, full-year worker without constraints on availability (Collins 2019; Gornick and Meyers 2003; Kalleberg 2011; Williams 2000). A workweek of 40 or more hours remains the standard, despite preferences to work less among many men and women, particularly at the transition to parenthood (Reynolds and Johnson 2012). These work hour norms and practices, combined with a lack of institutional support for reduced and flexible hours, impose significant wage penalties on employees who want fewer hours and more flexible employment (Cha and Weeden 2014; Mas and Pallais 2017; Weeden et al. 2016). Qualitative accounts have described in rich detail how inflexibility in work hours generates work-family conflict that ultimately pushes mothers out of the labor force (Stone 2007).

We build on this line of research, advancing the literature on work hour inflexibility and gender inequality in the labor market in three key ways. First, following Goldin (2014) and others, we argue that the way work hours are organized and compensated at the occupation level produces gender differences in employment, and we extend this research to examine the prevalence of the 40-plus-hour workweek and wage premiums to longer hours across a broad range of occupations. Second, we examine the link between occupational inflexibility and employment at the critical juncture of parenthood, asking whether higher levels of occupational inflexibility are associated with job-leaving following the transition to first birth, particularly among mothers. Third, we link detailed occupation-level data on work hour inflexibility from the American Community Survey (ACS) to large, nationally representative panels of men and women from the Survey of Income and Program Participation (SIPP), allowing us to directly measure the structure and remuneration of work hours in occupations and assess their role in shaping the employment outcomes of new mothers and fathers. Our approach sheds light on how individual employment decisions are jointly constrained by the structure of the labor market and persistent gendered cultural norms about breadwinning and caregiving.

## Background

### Workplace Organization and Gendered Employment Following Parenthood

A key premise of our work is that occupations are an important but understudied site of workplace organization relevant to both work hour inflexibility and mothers' employment. Weeden and Grusky (2005) found that detailed occupations explain much of the

variation in working long hours (49+ hours), working full-time, and weekly work hours, net of individual and family characteristics. They argued that work hour norms diffuse at the occupation level and are internalized by workers and that work practices embedded in institutional contexts further constrain individual discretion regarding work hours (see also Berg et al. 2004; Landivar 2014; Yu 2009). Workers may feel pressure to demonstrate their devotion to work by conforming to work hour norms (Blair-Loy 2003; Cha and Weeden 2014; Turco 2010), and they may find it difficult to find a job with more accommodating hours within the same occupation (Cortés and Pan 2017).

Goldin (2014) showed how work hour inflexibility operates at the occupational level and is differentially associated with men's and women's employment and earnings. Occupations disproportionately reward longer work hours when employees are less-effective substitutes for one another. For example, in business occupations, the importance of personal relationships and "face time" increases the value of a specific employee working longer and particular hours. By contrast, in pharmacy, technological changes and the shift to retail chain and hospital employment have meant that one pharmacist can easily pick up where another left off and that there is little gain to working longer hours (Goldin and Katz 2011). These occupational differences play into gendered employment outcomes: relative to women in business, who face substantial penalties to reduced hours and few reduced hour options, it is more common for women in pharmacy to work part-time and less common for them to take time out of the labor force (Bertrand et al. 2010; Goldin and Katz 2016).

Occupational work hour inflexibility should pose particular challenges for women at the critical juncture of parenthood. The caregiving and housework demands introduced by a new child are disproportionately borne by women (Baxter et al. 2008; Gjerdingen and Center 2005; Killewald and García-Manglano 2016; Sanchez and Thomson 1997; Yavorsky et al. 2015), even when employed full-time (Musick et al. 2016; Raley et al. 2012). The increase in family responsibilities at the transition to parenthood heightens mothers' work-family conflict and contributes to their labor force withdrawals (Glass and Camarigg 1992; Glass and Riley 1998; Stone 2007). Gendered patterns of work at home and in the labor market continue to be shaped by cultural norms that tie fatherhood primarily to full-time employment and motherhood to time-intensive, child-centered caregiving (Blair-Loy 2003; Hays 1997; Jacobs and Gerson 2016; Ridgeway 2011; Townsend 2002). Such patterns leave mothers more time-constrained in managing inflexibility on the job.

## Work Hour Inflexibility

Relative to other advanced industrialized countries, the United States provides little institutional support for mitigating work hour inflexibility (Collins 2019; Glass et al. 2016; Gornick and Meyers 2003; Kalleberg 2011). Cross-national evidence shows that women's employment is higher in countries with more part-time work and policies that support flexible work time and proportional pay for reduced hours (Blau and Kahn 2013; Pettit and Hook 2009). American women have lost ground to those in other OECD countries in terms of labor force participation rates, and nearly one-third of the relative decline can be traced to a lack of work-family policies, including part-time work entitlements, equal treatment for part-time workers, and paid parental leave (Blau

and Kahn 2013). Many European countries have also reduced their standard full-time workweek to a more family-friendly range below 40 hours (Gornick and Meyers 2003), whereas work hour standards in the United States have remained comparatively stable. The typical U.S. workplace continues to abide by the ideal, always-available-worker norm, and this all-or-nothing structure does not align well with caregiving responsibilities (Acker 1990; Correll et al. 2014; Goldin 2014; Kelly et al. 2010; Moen and Roehling 2005; Williams 2000). The lack of flexibility in work and family domains generates time constraints that are difficult to resolve (Clarkberg and Moen 2001; Jacobs and Gerson 2004; Reynolds and Johnson 2012; Stone 2007; Williams 2010).

Opportunities to reduce work hours below the 40-hour standard may be especially consequential for new mothers' employment. Although long hours ("overwork," defined as working 50+ hours per week) are an important dimension of work hour inflexibility (e.g., Cha 2013; Cha and Weeden 2014; Cortés and Pan 2019; Weeden et al. 2016), the 40-hour full-time standard is the critical threshold for the modal working mother. Women in the United States work an average of about 40 hours per week but would prefer to work closer to 30 (Jacobs and Gerson 2004; Kalleberg 2011), and mismatches between ideal and actual hours increase at the transition to parenthood (Reynolds and Johnson 2012). Workers' stated ideal work hours map poorly onto a labor market that offers few options between the standard 40-plus-hour workweek and part-time jobs of less than 20 hours per week, often without benefits (Jacobs and Gerson 2004; Gornick and Meyers 2003). Stone's qualitative account of opting out among professional mothers supports this notion: all of her subjects cited the inability to obtain "viable, meaningful, and valued alternatives to full-time work" as a major reason for job-leaving (Stone 2007:101).

The economic costs of work hour reductions further limit work hour flexibility in ways that bear on employment decisions. In the context of ideal worker norms and a lack of institutional support for proportional pay and benefits for reduced work hours in the United States, shorter hours and more flexible employment come with significant wage penalties (Cha and Weeden 2014; Gornick and Meyers 2003; Mas and Pallais 2017; Weeden et al. 2016). The lower remuneration reduces the benefit of employment relative to dropping out of the labor force (Goldin 2014; Jacobs and Gerson 2004). It also discourages workers from considering reduced work hours. For example, in data from the 1992 National Study of the Changing Workforce and 1998 General Social Survey, workers' preferences for work hour reductions were weaker when the economic costs of work hour reductions were made salient or when changes in pay were disproportional to earnings (Jacobs and Gerson 2004). The system of employer-provided health insurance in the United States further contributes to the costs of reduced work hours for employers and employees. As a fixed cost of employment, health insurance is typically tied to full-time hours, and the potential loss of health insurance presents a major hurdle to dropping below full-time employment status (Kalleberg 2011), especially for men and women not covered by a spouse.

### Occupational Variation in Work Hour Inflexibility and Mothers' Employment

Our approach focuses on the transition to motherhood and the constraints on employment imposed by work hour inflexibility at the occupational level—in particular, the prevalence of the 40-plus-hour workweek and wage premiums to longer hours. A small

body of studies has documented occupational differences in mothers' employment, finding evidence consistent with greater flexibility in work hours among women in professional and managerial occupations. Landivar (2014) described variation across 92 occupations in motherhood employment penalties using cross-sectional data from the ACS. She found that mothers in managerial and professional occupations came closest to their counterparts without children in employment, but they also had the biggest gaps in work hours relative to women without children, suggesting that these occupations offered more flexibility to scale back work hours in response to family circumstances. Damaske and Frech (2016) used group-based trajectories and panel data from the National Longitudinal Survey of Youth 1979 (NLSY79) to chart women's employment experiences across adulthood based on socioeconomic, work, and family characteristics at age 25. They found that women working in professional occupations at age 25 were more likely both to experience decreasing hours and to overwork relative to women in the service sector. Lu et al. (2017) used sequence analysis and SIPP panel data to chart women's short-term employment patterns in the year following childbirth. They showed that women in professional and managerial jobs were more likely to remain continuously employed following birth, whereas women in service, sales, and clerical jobs were more likely to drop out of work. In line with Landivar (2014), Lu and colleagues posited that these differences may be due to the relative flexibility and autonomy of white-collar jobs compared with blue-collar and service jobs, although they did not directly test mechanisms.

Recent studies have further explored mechanisms, examining how particular indicators of work hour inflexibility at the occupational level are associated with mother's employment. Goldin (2014) showed that face-time requirements within high-earning business, health, science, and technology occupations were associated with differences in women's wages. Using panel data from the SIPP, Cha (2013) focused on male-dominated occupations as a proxy for norms of overwork, and she showed that mothers working 50 hours or more per week in these occupations were more likely to leave the labor force. Drawing from a cross section of 18 industrialized countries, Cortés and Pan (2017) also found that fewer ever-married women (their partial proxy for motherhood) worked in occupations with a high prevalence of overwork. Conversely, elite college-educated women in pre-birth workplaces with a higher share of part-time workers were more likely to remain in the labor force 15 years after childbirth (Herr and Wolfram 2012). Qualitative accounts have documented the resistance that mothers face from employers in time-intensive professional and managerial occupations when they request reduced hours (Blair-Loy 2003; Stone 2007; Webber and Williams 2008).

Wage premiums to longer hours at the occupation level are another indicator of work hour inflexibility associated with gendered labor market outcomes. Cross-sectional data show that gender wage gaps are larger in occupations with higher wage premiums to longer work hours (Cha and Weeden 2014; Cortés and Pan 2019; Goldin 2014), presumably because caregiving demands limit women's ability to work longer hours in such occupations. Among women and men who remain in the labor force, occupation-level changes in both the prevalence of longer hours and how longer hours are rewarded have contributed to stalled progress toward gender wage equality (Cha and Weeden 2014). Longitudinal data provide evidence linking work hour wage premiums to maternal employment in Denmark. Danish women working in pre-birth occupations with higher wage returns to longer hours were more likely to shift out

of the private sector and into the more family-friendly—and lower-paying—public sector following a birth (Pertold-Gebicka et al. 2016).

In sum, prior literature has documented significant occupational variation in work hours and wage premiums to longer hours. Studies have further suggested that the structure and compensation of work hours at the occupation level shape mothers' work-related outcomes, although direct evidence is limited, particularly around the transition to parenthood. Much of the prior work in this area has used cross-sectional data to look at broad occupational classes, often among nonrepresentative samples, college graduates, or high-wage workers. Our study extends this line of research. It is novel in using nationally representative individual-level panel data merged with direct occupation-level measures of work hours and their compensation to assess how new parents' employment is shaped by pre-birth occupational work hour inflexibility. It is also unique in comparing within-person employment changes among mothers, fathers, and childless women to differentiate between general employment patterns affecting all workers in an occupation and workplace processes that distinctly disadvantage mothers.

## Our Study

We examine how the prevalence of the 40-plus-hour workweek and wage returns to longer hours interact with the demands of new motherhood to constrain employment. Given gendered parenting norms and patterns of caregiving, we posit that occupational work hour inflexibility will reduce mothers' employment but not fathers'. We further hypothesize that occupational inflexibility will be inconsequential for women without the intensive caregiving demands of young children. To assess our hypotheses, we estimate the association between pre-birth occupational work hour inflexibility and subsequent employment among new mothers and new fathers, and we test the robustness of our findings with samples of women who remain childless and mothers before pregnancy. We merge recent, nationally representative individual-level panel data from the SIPP with occupation-level measures from the ACS. Individual-level panel data allow us to establish temporal ordering in the relationship between pre-birth occupational work hour inflexibility and post-birth employment and to account for time-invariant factors that may be associated with both occupational choices and employment—such as orientation toward work and family—with individual fixed effects.

Our analytic strategy provides traction in rigorously evaluating our argument that occupational work hour inflexibility constrains mothers' employment specifically. We estimate parallel models for men and women transitioning to parenthood to assess the interaction of parenthood, gender, and occupational work hour inflexibility in generating work-family conflict and, in turn, employment exits. To further address the possibility that occupational variation in gendered employment patterns for new parents is confounded by factors independent of parenthood, we conduct placebo regressions with women who remain childless throughout the SIPP panels, randomly assigning a "placebo" birth to childless women and assessing whether pre-placebo birth occupational work hour inflexibility predicts subsequent employment. Finally, for a subset of women who are observed at least three years before a first birth, we conduct an additional falsification test to examine whether occupational inflexibility measured more than three years before a birth predicts employment in the year before a pregnancy.

Our models control for a number of individual- and occupation-level factors that could confound the relationship between pre-birth occupational work hour inflexibility and post-birth employment. At the individual level, these include person fixed effects; calendar year dummy variables; and time-varying sociodemographic characteristics, such as age, school enrollment, income of other household members, region, and higher-order births during the observation period. Given that husbands' long work hours increase the chances that women exit the labor force (Cha 2010; Shafer 2011; Stone 2007), we also adjust for combinations of partnership status and partners' working hours for both men and women (unpartnered, partner not employed, employed part-time, employed full-time, and overworking). We control separately for marital status, which, in combination with the partnership and partner employment indicators in multivariable models, captures the distinction between married and cohabiting individuals. Because own work hours and wages may be endogenous to employment changes, we include these measures only in supplementary models. In our Results section, we report on the robustness of our findings to the inclusion of several time-invariant, conventional individual predictors of maternal employment (pre-birth education, wages, work hours, job tenure, race and ethnicity, and age at birth) interacted with motherhood status.

At the occupation level, we include interactions between parental status and mean occupational wages, education, and share unemployed. Longer work hours and higher wage premiums to longer hours tend to be correlated with higher wages, more-educated workers, and more job stability (Cha and Weeden 2014; Jacobs and Gerson 2004; Kalleberg 2011). Accounting for mean occupational wages interacted with motherhood status, for example, allows us to estimate how the prevalence of longer hours and wage premiums to longer hours are associated with employment among new mothers, net of the average economic rewards of employment in a particular occupation, which should increase the economic incentive to continue working.

## Data and Method

### Individual-Level Panel Data and Samples

#### *SIPP Panels*

We track changes in employment around the transition to parenthood using data from the 2004 and 2008 SIPP panels. These panels are nationally representative and include rich, monthly information on family transitions, employment, occupation, and income of all household members based on interviews conducted every four months. The 2004 panel follows respondents for up to 48 months, and the 2008 panel follows them for up to 64 months.

The SIPP panels have multiple advantages for our analysis. First, samples are large enough to identify transitions to a first birth with sufficient statistical power to evaluate our hypotheses. Second, the data present a relatively recent portrait of the U.S. population (2004–2013). Third, high-quality monthly measures of employment and income for all adults in the household allow us to time employment changes relative to birth month and to account for potentially important confounders of the relationship between pre-birth occupational inflexibility and post-birth employment, such as

household economic need. Finally, the panel structure of the data and inclusion of men and childless women provide leverage in netting out stable characteristics of individuals and testing the predictions of our theoretical model.

### *Samples*

We restrict our main sample to women of childbearing age (18–45) who were childless when first observed in the SIPP ( $N=29,183$ ), added a newborn child to the household during the panel ( $N=3,192$ ), and were observed working in any of 24 months before first birth ( $N=2,281$ ). We further exclude women with missing data on covariates, for a final sample of 2,239 women. To track birth transitions and employment changes over the panel, we convert this person-level file to a person-month file and follow women from approximately one year before a first birth to up to three years following the birth. Because of variation in the timing of birth transitions over the panels, we have an unbalanced panel that varies in the number of months women are observed pre- and post-birth. Women in our main sample are observed for an average of 35 months, and our final person-month sample of women who transition to motherhood includes 77,912 records.

We follow analogous procedures for generating our comparison samples of fathers and childless women. Our sample of fathers includes 1,667 men ( $N=54,281$  person-months) who were observed both pre- and post-birth and who were working during at least one pre-birth observation. Because we do not have fertility histories for our sample and code childbirth on the basis of household rosters, we cannot observe new parenthood for those who live apart from their children over the entire panel. Although this arrangement is rare among mothers, it is more common among fathers (Killewald 2013). All fathers in our sample are thus married or cohabiting with the child's mother at some point post-birth, but there are some unpartnered (noncoresidential) person-month observations. Our comparison sample of childless women includes 16,878 women ( $N=439,312$  person-month observations) who had no children at any point during the SIPP.

## **Individual-Level Measures**

### *Transitions to First Birth*

We construct a dichotomous indicator of parental status using information on household relationships and child age to identify the month in which a newborn child appeared in the household. In additional analyses, we create a set of dummy variables to assess years since the first birth. Although transitions to higher-order births are relatively uncommon given right-censoring and a maximum of 36 months of follow-up in our sample, we include a time-varying indicator for the number of additional births beyond the first.

### *Employment*

We construct a monthly employment indicator based on questions about whether the respondent held a job from an employer, a business, or another work arrangement dur-



ing the reference month. We prefer this measure to *labor force participation* (employed or seeking employment) because time not employed for whatever reason should be associated with occupational work hour inflexibility and have similarly negative consequences for career trajectories and human capital depreciation (Bertrand et al. 2010; Mincer and Ofek 1982). Because our interest is in whether new mothers are working for pay (whether for an employer or in their own business), we also include the self-employed. We report on the sensitivity of our results to our measurement of employment status in the Results section.

### *Pre-Birth Occupation*

The SIPP collected occupation data at the three-digit level ( $N=504$  occupations) for every job the respondent worked over the panel. We select occupations from the employment observation closest to 12 months before first birth, and we merge these occupation codes to occupational work hour measures assessed in the ACS (see the upcoming discussion). We select the occupation measured closest to 12 months before birth in an effort to identify occupational characteristics that are relevant to post-birth employment decisions without simultaneously capturing occupational changes in anticipation of a birth. Depending on when births occur relative to the start and end of the SIPP panel, nonparticipation in a given wave of the SIPP, and movements into and out of employment across months, there is some variation in the timing of this measurement. Most observations are taken from exactly 12 months before the birth (55%), 40% are from less than 12 months pre-birth, and the other 5% are from more than 12 months pre-birth. Just under one-quarter (24%) of women in our sample changed occupations between 24 months pre-birth and the birth month. We test the sensitivity of our findings to multiple alternative pre-birth reference points for identifying pre-birth occupations.

### *Individual-Level Controls*

All models include individual fixed effects, single calendar year dummy variables, logged income of other household members, age, whether currently enrolled in school, region (West, Midwest, Northeast, or South), combinations of partnership status and partner work hours, and marital status. Table 1 presents descriptive statistics on individual- and occupation-level variables measured at the first pre-birth work observation for our analytic sample of women and men who transition to parenthood during the SIPP panels.

### **Occupation-Level Data and Measures**

We use data on working-age (18–64) employed men and women from the pooled 2004–2013 ACS to generate occupation-level characteristics. The ACS is a nationally representative household survey that includes information on demographic characteristics, occupations, work hours, and wages for large U.S. samples. The large samples of the ACS allow us to collapse information at the detailed occupation level and

**Table 1** Descriptive statistics for women's and men's first pre-birth work observation

|                                                  | Women |       | Men   |       |
|--------------------------------------------------|-------|-------|-------|-------|
|                                                  | Mean  | SD    | Mean  | SD    |
| <b>Pre-Birth Occupational Inflexibility</b>      |       |       |       |       |
| Share 40+ weekly work hours                      | .651  | .203  | .816  | .143  |
| Weekly work hour wage premium                    | .877  | .124  | .845  | .146  |
| <b>Pre-Birth Occupational Controls</b>           |       |       |       |       |
| Years of education                               | 13.9  | 2.2   | 13.9  | 2.2   |
| Log hourly wage                                  | 2.84  | 0.52  | 2.96  | 0.41  |
| Share unemployed                                 | .057  | .033  | .058  | .035  |
| <b>Individual and Household Characteristics</b>  |       |       |       |       |
| Other monthly household income                   | 4,354 | 4,312 | 2,929 | 2,762 |
| Age                                              | 26.5  | 5.8   | 31.8  | 8.0   |
| Currently enrolled in school                     | .159  |       | .082  |       |
| <b>Region</b>                                    |       |       |       |       |
| West                                             | .216  |       | .228  |       |
| Midwest                                          | .273  |       | .286  |       |
| Northeast                                        | .168  |       | .166  |       |
| South                                            | .343  |       | .321  |       |
| <b>Partnership Status and Partner Employment</b> |       |       |       |       |
| Unpartnered                                      | .381  |       | .174  |       |
| Partner not employed                             | .027  |       | .049  |       |
| Partner works part-time                          | .035  |       | .136  |       |
| Partner works full-time                          | .401  |       | .547  |       |
| Partner overworks                                | .157  |       | .095  |       |
| Married                                          | .548  |       | .728  |       |
| <i>N</i>                                         | 2,239 |       | 1,667 |       |

*Notes:* The sample is women and men who were working before a first birth. Descriptive statistics are unweighted.

*Source:* SIPP, 2004 and 2008 panels.

generate aggregated measures of occupational work hour inflexibility. Our sample for estimating these occupation-level measures includes more than 12 million men and women ( $N=12,057,661$ ) working in 541 occupations.<sup>1</sup> Estimating occupational characteristics from both male and female workers reduces measurement error due to small samples in highly gender-segregated occupations; we test the robustness of our results to occupational measures drawn only from male workers.

The ACS has several other advantages for our study. First, the ACS covers the same period as the SIPP data, which is important given changes over time in the prevalence of and wage premiums to working longer hours (Cha and Weeden 2014). Second, the ACS allows us to construct alternative measures of work hour inflexibility to evaluate the robustness of our findings. Finally, the data enable us to measure

<sup>1</sup> Because the SIPP aggregates some occupations, there are fewer SIPP occupation codes (504) than ACS occupation codes (541). For aggregated occupations in the SIPP, we take the average of characteristics from more detailed occupations in the ACS.

key occupation-level control variables that may be correlated with both work hour inflexibility and employment.

### *Work Hour Inflexibility*

Our first indicator of occupational work hour inflexibility is the *prevalence of the 40-plus-hour workweek*, or the proportion of workers in a given occupation who work at least 40 hours per week. Our second indicator is the *wage return to working longer hours* in an occupation. To measure returns to longer hours, we follow a regression-based approach similar to that of Cortés and Pan (2019) and Goldin (2014) and estimate the slope or elasticity of earnings with respect to weekly work hours in each occupation (see the online appendix note). Higher values indicate higher premiums to longer hours and steeper penalties to reduced hours.

### *Occupation-Level Controls*

We include interactions between parental status and other pre-birth occupational characteristics that may confound the relationship between occupational work hour inflexibility and employment, including mean log hourly wages, mean years of education, and the share of workers currently unemployed in the occupation.

### **Fixed-Effects Approach**

We leverage the SIPP's monthly data on labor force participation and entry into parenthood over the course of the panel to assess changes in employment following first birth. Our main specification includes women who have a first birth in the panel and relies on a dichotomous indicator that collapses monthly birth timing into the months before and after the transition to parenthood to identify within-person changes (Kuziemko et al. 2018). Because our interest is in how employment is influenced by indicators of women's pre-birth occupational work hour inflexibility, we include interactions between our time-invariant pre-birth occupational characteristics and our time-varying parental status indicator. This approach allows us to estimate whether within-person employment changes following the transition to parenthood depend on levels of pre-birth occupational work hour inflexibility.

Our analysis takes the form of a linear probability model with individual fixed effects and can be written as follows:

$$\begin{aligned} Working_{it} = & \alpha_i + \beta_1 Parent_{it} + \beta_2 OccShareFortyPlus_i \times Parent_{it} \\ & + \beta_3 OccHoursWagePremium_i \times Parent_{it} + \beta_k \sum_{k=1}^K X_{ikt} \\ & + \beta_j \sum_{j=1}^J OccControls_{ij} \times Parent_{it} + e_{it}, \end{aligned}$$

where  $i$  indexes individuals,  $t$  indexes time in months relative to the birth, and  $\alpha_i$  is an individual fixed effect. *Parent* is a time-varying indicator for the transition to

parenthood,  $OccShareFortyPlus \times Parent$  is an interaction between the prevalence of 40-plus-hour workweeks in an individual's pre-birth occupation and their parental status, and  $OccHoursWagePremium \times Parent$  is an interaction between the wage return to longer hours in an individual's pre-birth occupation and parental status. The model includes a vector of time-varying individual-level controls and interactions between parental status and occupation-level controls: mean log hourly wages, mean years of education, and the share of workers who are unemployed.

We prefer fixed-effect linear probability models (LPMs) over fixed-effect logit models in estimating employment changes following birth because LPMs allow us to preserve a larger sample (maximizing our statistical power). We prefer LPMs over random-effect logit models because LPMs enable us to isolate within-person changes in employment based on pre-birth occupational inflexibility. Interpreting interactions and comparing estimates across LPM models is also more straightforward. We report later on the robustness of our findings to alternative model specifications.

We estimate separate models for our main sample of women who transition to a first birth, as well as our comparison samples: men who transition to a first birth, childless women assigned a "placebo" birth, and mothers before pregnancy. To construct our placebo birth sample, we restrict our analyses to women who are childless at first observation in the SIPP and who remain childless throughout the SIPP panel. We then assign a placebo birth in a random month for each woman and identify the work observation closest to 12 months before the placebo birth month. For our analysis of mothers before pregnancy, we examine whether occupational work hour inflexibility measured at least three years before a birth affects employment up to one year before birth. Because events that have not yet occurred or did not actually occur can have no causal effects, these placebo regressions provide important analytical leverage in testing our theoretical model.

## Results

### Occupational Work Hour Inflexibility

Our indicators of work hour inflexibility demonstrate substantial variability across occupations. Panel a of [Figure 1](#) shows that the prevalence of the 40-plus-hour workweek is right-skewed, with a mean of 0.78 and a standard deviation of 0.17. This indicates that in a typical occupation, 78% of employees work 40 or more weekly work hours—and that 40 or more hours is the norm. Panel a also shows significant variation across occupations in the prevalence of 40-plus-hour workweeks. For example, whereas only 50% of childcare workers, 56% of registered nurses, and 73% of pharmacists work 40 or more hours per week, 90% of public relations managers, 92% of marketing and sales managers, and 96% of police officers do so.

Panel b of [Figure 1](#) shows that the estimated slope of the relationship between longer work hours and wages is approximately normally distributed, with a mean of 0.83 and a standard deviation of 0.19 (values greater than 1 indicate that pay increases more than proportionally for a given change in weekly work hours, and values less than 1 suggest a change that is less than proportional). Data show substantial variation across occupations in the returns to long hours. The estimated wage premium to longer hours for dentists is 0.53 (the 6th percentile), 0.61 for massage therapists (11th percentile),

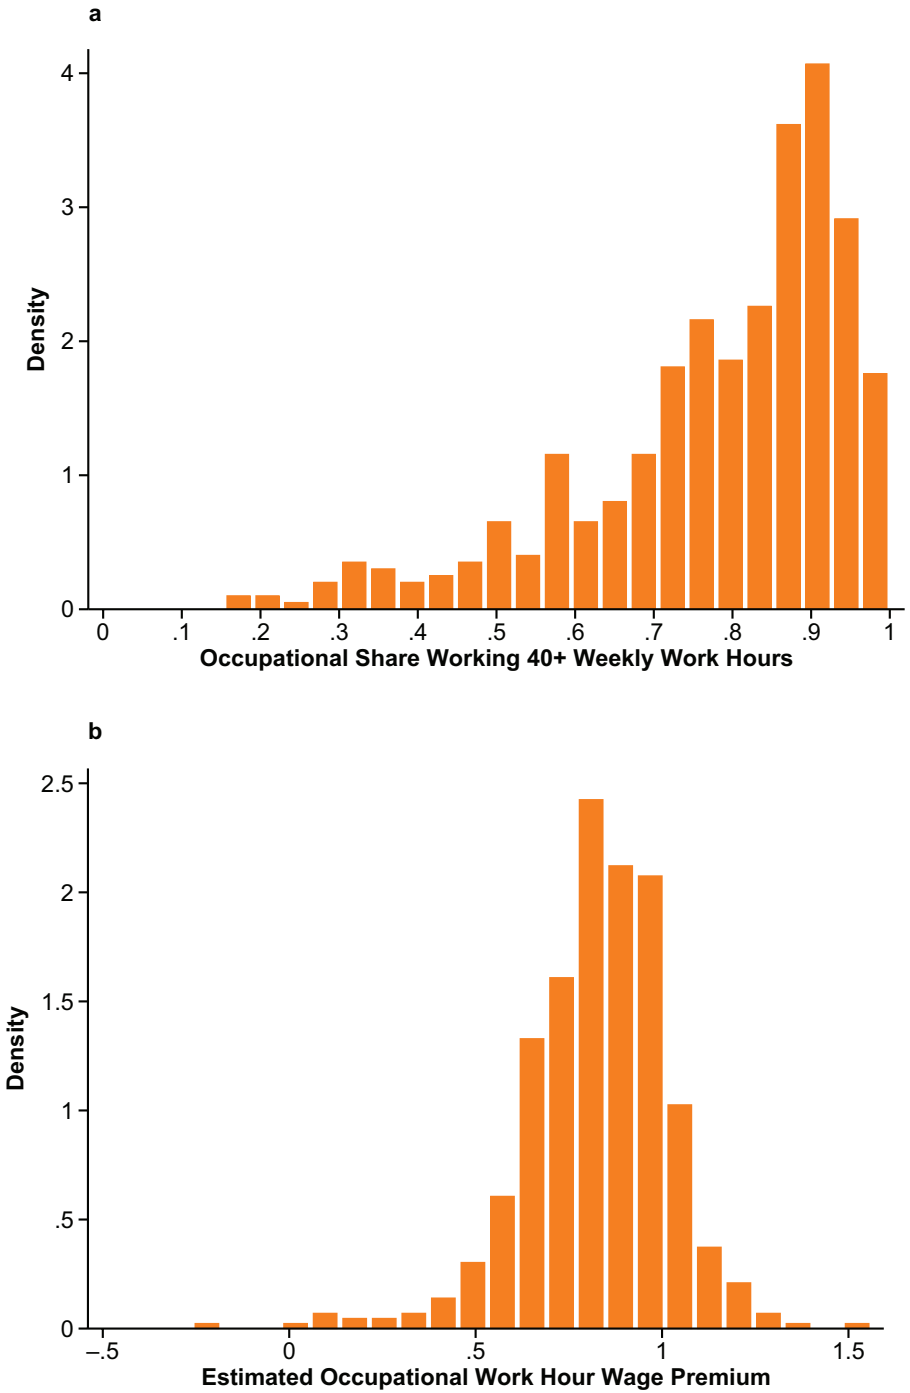

Fig. 1 Occupational share working 40+ hours weekly and estimated occupational wage returns to weekly work hours. *Source:* 2004–2013 American Community Survey.

and 0.75 for teacher assistants (31st percentile), and this rises to 0.94 for computer scientists and system analysts (73rd percentile), 1.03 for advertising and promotions managers (90th percentile), and 1.04 for financial managers (91st percentile).

To evaluate what types of occupations and workplaces tend to have higher levels of work hour inflexibility, we examine how the structure and compensation of work hours vary across major occupational groupings and by average worker and job characteristics. The first panel of Table A1 (online appendix) shows that male-dominated occupational groups—such as construction, extraction, and maintenance; production, transportation, and material moving occupations; and military occupations—tend to have a higher prevalence of 40-plus-hour workweeks but relatively low wage returns to longer hours. Consistent with these patterns, we find that the occupational share female is negatively correlated with the prevalence of 40-plus-hour workweeks but positively correlated with the work hour wage premium. In addition, professional/managerial occupations have a prevalence of 40-plus-hour workweeks close to the sample mean and high wage returns to longer hours, whereas service occupations have both a lower prevalence of 40-plus-hour workweeks and lower wage returns to longer hours. Sales and office occupations have a relatively low prevalence of 40-plus-hour workweeks but the highest estimated wage returns to longer hours. Additional occupation-level correlates of work hour inflexibility indicate that occupations with more hourly workers and more self-employed workers have a lower prevalence of 40-plus-hour workweeks, and occupations with more unionized workers and more self-employed workers have lower work hour wage premiums (see the second panel of Table A1, online appendix).

### Employment Patterns Around the Transition to Parenthood

Figure 2 plots the share of women and men working in the two years before a first birth and up to three years following the birth. A significant share of women stops working in anticipation of the birth and in the early months following the birth. By three years post-birth, women's employment has not returned to its pre-birth level. Because men's employment remains high pre-birth and shows no discontinuity post-birth, the gender employment gap increases significantly at the transition to parenthood.

### Multivariable Regression Results

Multivariable regression results assess how pre-birth occupational work hour inflexibility is associated with post-birth employment, net of individual fixed effects and individual and occupational controls. Table 2 shows a summary of key results from linear probability models of employment estimated separately for our main sample of women who transition to parenthood and our comparison samples; Table A2 in the online appendix shows our full model estimates. Results are not sensitive to our approach to selecting the pre-birth occupation (see panels 1 and 2 of Figure A1, online appendix). For mothers (Table 2, column 1), results strongly support our hypothesis that pre-birth occupational work hour inflexibility reduces post-birth employment. The interaction between motherhood status and the share of workers in women's

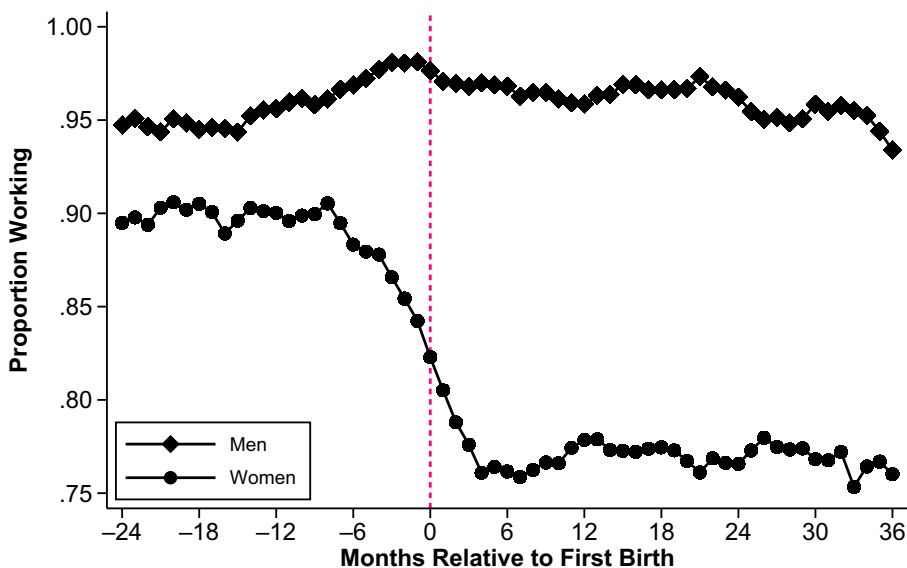

Fig. 2 Proportion of women and men working before and after a first birth. Source: SIPP, 2004 and 2008 panels.

pre-birth occupation that work 40 or more hours per week is large, negative, and statistically significant. A 1 standard deviation increase in the share of 40-plus-hour workers in an occupation (0.17) is associated with a 3.1 percentage point lower probability of mothers working post-birth. The interaction between motherhood status and the occupational wage return to longer hours is also large, negative, and statistically significant. A 1 standard deviation increase in the wage premium to an additional hour of work in an occupation (0.19) is associated with a 2.7 percentage point lower probability of working post-birth.

Results for fathers (Table 2, column 2) are also consistent with our expectation that pre-birth occupational work hour inflexibility would be inconsequential for their post-birth employment. Interactions between fatherhood status and pre-birth occupational work hour inflexibility are much smaller in magnitude, and neither is statistically significant. These analyses provide strong evidence that occupational work hour inflexibility constrains employment for new mothers—but not for new fathers.

Figure 3 summarizes differences between mothers' and fathers' post-birth employment based on pre-birth occupational work hour inflexibility, showing predicted probabilities of currently working. Before a birth, there is a relatively small gap in the probability of working for women and men who were working at some point in the two years before the birth. Because men's employment is not affected by either parenthood or its interaction with measures of work hour inflexibility, their employment remains high following a birth regardless of their level of pre-birth occupational inflexibility. Women's post-birth employment, however, depends on pre-birth occupational inflexibility. Among women in flexible occupations, which we operationalize as those that are 1 standard deviation below the mean in the share of 40-plus-hour workers (0.61) and 1 standard deviation below the mean in the work hour wage premium (0.63), an estimated 79.2% of women are working post-birth. In contrast,

**Table 2** Regressions of parental status and pre-birth occupational work hour inflexibility on employment: Fixed-effects linear probability models

|                                        | Mothers            | Fathers          | Childless Women:<br>Placebo | Mothers:<br>Pre-Pregnancy |
|----------------------------------------|--------------------|------------------|-----------------------------|---------------------------|
|                                        | (1)                | (2)              | (3)                         | (4)                       |
| Parent                                 | 0.001<br>(0.10)    | 0.043<br>(0.06)  | -0.037<br>(0.03)            | 0.126<br>(0.11)           |
| Share 40+ Weekly Work Hours × Parent   | -0.180**<br>(0.07) | -0.034<br>(0.05) | -0.029<br>(0.02)            | -0.060<br>(0.09)          |
| Weekly Work Hour Wage Premium × Parent | -0.142**<br>(0.05) | -0.007<br>(0.02) | -0.016<br>(0.02)            | 0.034<br>(0.07)           |
| Number of Individuals                  | 2,239              | 1,667            | 16,878                      | 813                       |
| Person-Month Observations              | 77,912             | 54,281           | 439,312                     | 18,968                    |

*Notes:* Robust standard errors are shown in parentheses. All models include individual fixed effects and control for parenthood status by occupational characteristics (mean years of education, mean log hourly wages, and mean unemployment), calendar year fixed effects, logged income of other household members, age, school enrollment, region, partnership status and partner employment (unpartnered, partner not employed, partner works part-time, partner works full-time, and partner overworks), and marital status. Models 1 and 2 also control for higher-order births. Model 4 uses Years 3 and 4 pre-birth as the reference period and Year 2 pre-birth as the placebo indicator of parenthood.

*Source:* SIPP, 2004 and 2008 panels.

\* $p < .05$ ; \*\* $p < .01$ ; \*\*\* $p < .001$  (two-tailed tests)

among women in inflexible occupations, which we define as those that are 1 standard deviation above the mean in the share of those working 40+ hours per week (0.95) and 1 standard deviation above the mean in the work hour wage premium (1.02), only 67.6% of women are working post-birth.

Our analyses of childless women provide further support for the predictions of our theoretical model, in particular isolating the effect of work hour inflexibility on mothers' employment rather than more general employment declines associated with occupational inflexibility that affect all women regardless of family demands. Consistent with our hypotheses, for childless women with a placebo birth, we find that interactions between pre-placebo birth occupational work hour inflexibility and placebo motherhood are small in magnitude and not statistically significant (Table 2, column 3). Similarly, for the subset of women observed at least three years before a first birth, the same null findings hold (Table 2, column 4). Occupational work hour inflexibility three to four years before a first birth does not predict women's employment in the year before pregnancy. Our approach provides critical analytic leverage in isolating how work hour inflexibility at the occupation level combines with the demands of motherhood to shape women's employment trajectories.

### Measurement of Occupational Work Hour Inflexibility

We empirically test various occupational work hour prevalence thresholds and alternative measures of work hour inflexibility. First, we consider the appropriateness of our 40-plus-hour workweek threshold for assessing work hour inflexibility. We examine



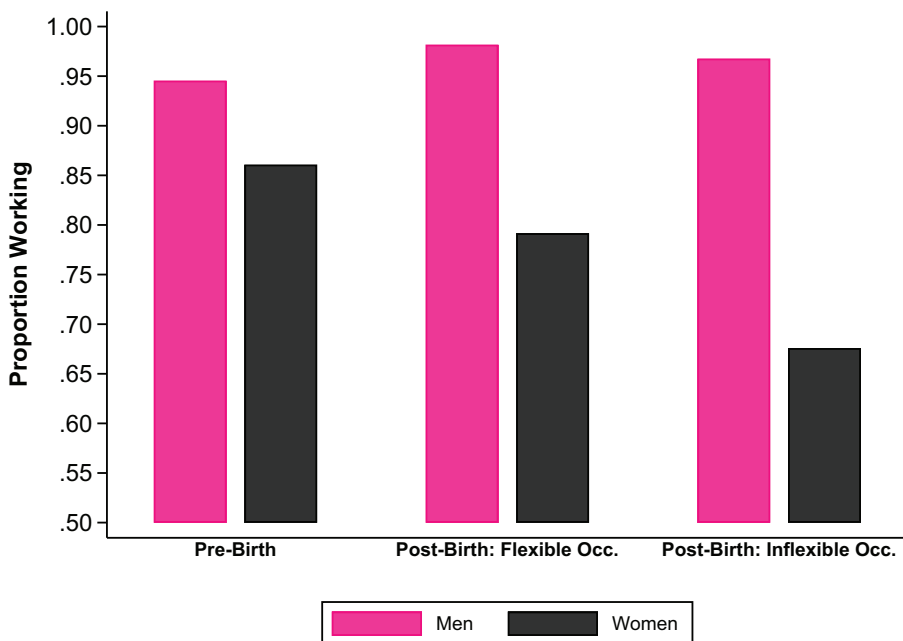

**Fig. 3** Predicted proportion of men and women working pre- and post-birth by occupation share 40+ weekly work hours and wage returns to weekly work hours. Predictions from fixed-effects linear probability models (shown in Table 2). Flexible occupations are defined as 1 standard deviation below the occupation mean in the share of those working 40+ hours weekly (0.61), and 1 standard deviation below the work hours wage premium occupation mean (0.63). Inflexible occupations are defined as 1 standard deviation above the mean in the share of those working 40+ hours weekly (0.95), and 1 standard deviation above the work hours wage premium mean (1.02). *Source:* SIPP, 2004 and 2008 panels.

work hour prevalence thresholds at or below 20, 25, 30, and 35 hours, and at or above 40, 45, 50, 55, and 60 hours. Figure 4 (see also panel 1 of Table A3, online appendix) shows that in occupations with a high share working less than 40 hours, post-birth employment is higher; in occupations with a high share working 40 hours or more, post-birth employment is lower. For occupations with a high share working 45 hours or more, the association with post-birth employment is not statistically significant. We view this as an important and novel finding because it suggests that the relevant margin for decisions around new mothers' employment—in a period of particularly intense caregiving demands—is not cutting back from overwork to full-time hours but rather cutting back from full-time hours to something less than 40 hours per week. Comparing measures based on different segments of the work hour distribution (the 25th, 50th, and 75th percentile of work hours in an occupation) leads to similar conclusions. We find that the bottom and middle portion of the work hour distribution is more relevant to new mothers' employment than the top of the work hour distribution (Table A3, panel 2).

Second, we explore the possibility that occupations with more variation in weekly work hours would apply less normative pressure on individuals with respect to work hours. We consider variation in work hours as an indicator of occupational work

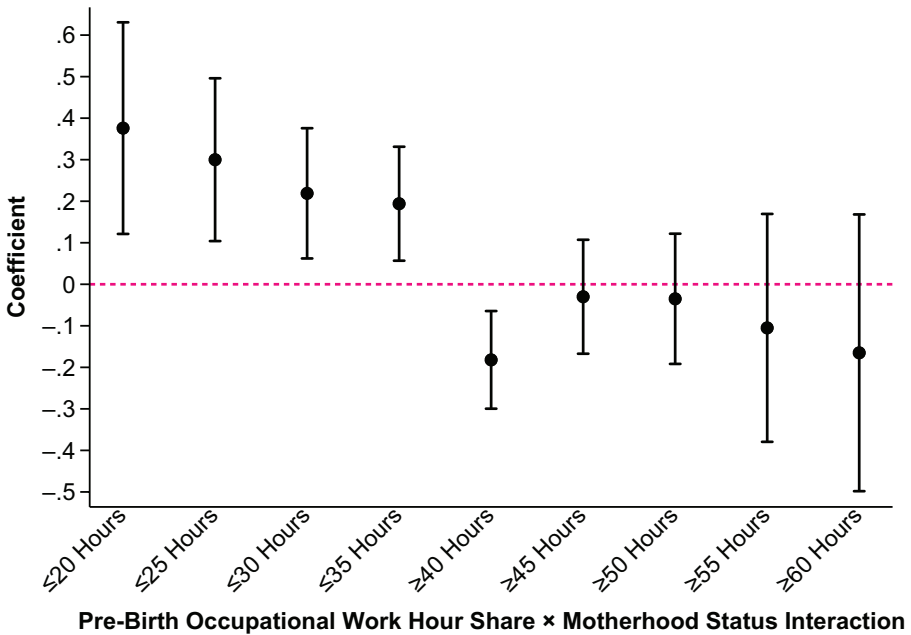

**Fig. 4** Plotted interactions between motherhood status and pre-birth occupational prevalence of alternative work hour thresholds. All estimates are from separate models. All models include the full set of covariates. *Source:* SIPP, 2004 and 2008 panels.

hour inflexibility, and we find a positive but not statistically significant association ( $p=.07$ ) between the standard deviation of weekly work hours in an occupation and mothers' employment, net of average weekly hours in an occupation (Table A3, panel 3). Adding the standard deviation of weekly work hours to our final models also did not change our estimated associations of the share of 40-plus-hour workers and wage premiums to longer hours with mothers' employment.

Third, we consider whether it is more appropriate to rely on only men's work patterns to generate our key occupational measures, based on the idea that men's behavior may set the normative expectations for all workers at the occupational level. The fourth panel of Table A3 shows results of our main model but with occupational measures derived from the distribution of male workers only (vs. all workers). Results are consistent with our key findings, suggesting that the work hours of male workers in an occupation are not uniquely important in shaping new mothers' employment.

Finally, following Cha's (2013) research treating the percentage male in an occupation as an indicator of work hour norms, we examine the possibility that occupational gender composition confounds the relationship between our measures of work hour inflexibility and new mothers' employment. The fifth panel of Table A3 shows results of our main model but with the addition of percentage female at the occupation level interacted with parenthood. The interaction of percentage female by parenthood is not statistically significant, and it does not change our key results. We find no evidence that the percentage female in an occupation shapes maternal employment, net of our more direct measures of work hour inflexibility.

## Additional Robustness Checks

### *Accounting for Time Following Birth*

We test the sensitivity of our results to our treatment of time since birth. We replace our dichotomous parental status measure with indicators for years 1, 2, and 3 following birth, which we interact with our measures of occupational work hour inflexibility. Modeling associations between pre-birth occupational inflexibility by years relative to birth allows us to assess whether the effects fade, remain stable, or increase over time and provides leverage in evaluating whether the estimated effects are plausibly due to variation across occupations in access to parental leave that may be correlated with work hour flexibility.<sup>2</sup> If occupational differences in access to parental leave are driving the associations between work hour inflexibility and employment, we would expect to see the effects disappear after a few months and therefore to observe an association only between occupational work hour inflexibility and employment during the first year following a birth.

Consistent with analyses using our dichotomous measure of parental status, results in Table A4 (online appendix) show that the share working 40 or more hours per week and the wage returns to longer hours in women's pre-birth occupations are both negatively associated with employment in each year following the birth. Interactions between our indicators of years post-birth and the share working 40 or more hours weekly are statistically significant in Years 1 and 2 (joint significance test for all three years:  $p = .06$ ), as are interactions between years post-birth and wage returns to longer work hours in Years 2 and 3 (joint significance test for all three years:  $p = .01$ ). Moreover, given that the point estimates for both indicators of occupational work hour inflexibility are larger in Years 2 and 3 relative to Year 1, these analyses provide no evidence that the effects of occupational work hour inflexibility fade over time or are driven by differences in access to parental leave.

### *Measuring and Modeling Employment*

We examine the robustness of our findings to various approaches to measuring and modeling employment following birth (see results shown in Table A5, online appendix). In the first column, we find that results from models of labor force participation (employed or seeking work) are substantively identical to those based on our employment measure. In the second column, we demonstrate that results are robust to the exclusion of self-employed workers. In the third and fourth columns, we present results from multinomial logistic regression models with part-time employment, full-time employment, and not working as outcomes. These results are consistent with our employment and labor force participation outcomes. Finally, columns 4 and 5 show that findings are robust using both random and fixed-effects logit models.

<sup>2</sup> The SIPP employment measure captures whether an individual had a job but was absent from work for one or more weeks in a month for reasons other than a layoff, but it does not enable us to directly measure parental leave.

### *Additional Potential Confounders*

Finally, we estimate supplemental models with several time-invariant, conventional individual predictors of maternal employment interacted with motherhood status. These pre-birth measures include hourly wage, educational attainment, age at birth, race and ethnicity, whether worked full-time, job tenure, and indicators of partnership status and partner work hours. Although we prefer our more parsimonious specification, analyses in Table A6 (online appendix) demonstrate the same strong and statistically significant negative association between occupational work hour inflexibility and mothers'—but not fathers'—employment.

## **Discussion and Conclusion**

Despite the importance of parenthood-related work interruptions in accounting for the gender wage gap and evidence of considerable occupational variation in work hour inflexibility, relatively little research has assessed how structural features of the labor market impact mothers' employment. This study extends scholarship on gendered work and family processes by integrating insights from studies of work hour inflexibility at the individual level with research on the social organization and compensation of work hours at the occupation level. Our innovative approach considers mothers' employment decisions as embedded in occupational contexts that provide varying degrees of flexibility in managing the competing demands of motherhood and employment. Using individual-level panel data merged to characteristics of occupations, we estimate the effect of two indicators of occupational work hour inflexibility on new mothers' employment. We also run parallel models with theoretically relevant comparison groups to identify the conditions under which occupational inflexibility constrains employment. Our study is the first to use recent, nationally representative data to estimate the gendered consequences of occupational inflexibility on new parents' employment decisions.

We theorize that intensive caregiving demands and the gendered cultural context of parenthood interact with work hour inflexibility to constrain new mothers'—but not new fathers' or childless women's—employment. Our findings provide consistent support for our hypotheses: women working in pre-birth occupations with a higher prevalence of 40-plus-hour workweeks and a higher wage premium to longer work hours were significantly less likely to be working post-birth than women in occupations in which 40-plus-hour workweeks were less common and work hour wage premiums smaller. Comparisons with new fathers, placebo births among childless women, and pre-trends before pregnancy among women who subsequently had a first birth demonstrated that the effects of work hour inflexibility on employment are limited to mothers. Although media accounts often highlight mothers' preferences as determinants of decisions to opt out of employment (Kuperberg and Stone 2008), our results are more consistent with qualitative studies showing that many mothers are pushed out of the labor force by inflexible jobs that fail to provide meaningful and economically viable reduced work hour options (Stone 2007). Our findings contribute to a growing body of research on work hour inflexibility and gender inequality in the labor market.

Our analysis nonetheless has important limitations. Despite the methodological strengths of our approach, causality is difficult to establish without random assign-

ment. Few studies have used experimental designs to estimate the causal effects of workplace flexibility on worker outcomes (for exceptions, see Kelly et al. 2014; Moen et al. 2016). Future research could further attempt to isolate the causal effects of workplace inflexibility by implementing group-randomized interventions that allow workers to reduce their hours following a birth and eliminate wage penalties to reduced hours. Studies could also leverage policy changes in European countries that provide full-time workers with the right to shift to part-time hours and eliminate wage penalties to reduced hour employment.

Although the period surrounding the transition to parenthood is particularly important for understanding gender inequality in the labor market, a limitation of our analysis derives from the relatively short window of observation in the SIPP. We find persistence in the estimated effects of work hour inflexibility through the third year post-birth, suggesting that remaining in the labor force may be challenging in occupations that have few opportunities for reduced hours and that disproportionately penalize shorter hours, or that shifting into more flexible occupations is difficult. Research focusing on highly educated women shows that the consequences of workplace inflexibility on employment persist over longer durations (Herr and Wolfram 2012; Stone 2007). Further, we know that employment breaks are associated with significant long-term wage penalties (Bertrand et al. 2010; Blau and Kahn 2017; England et al. 2016) and that employers discriminate against workers with caregiving-related employment gaps (Weisshaar 2018). Evidence thus points to barriers to mothers' labor market reentry that may persist or even increase over time. The use of nationally representative data to evaluate the potential long-term consequences of occupational work hour inflexibility is an important area for future research.

Scholars have theorized that despite gender-egalitarian ideals for sharing parenting and paid work, workplace inflexibility and a lack of policy supports for combining work and family continue to push men and women toward more traditional patterns of gender specialization at work and at home (Gerson 2010; Pedulla and Thébaud 2015). Our finding that only women's post-birth employment is responsive to work hour inflexibility is broadly consistent with this perspective on the stalled gender revolution. It supports the notion that male breadwinner norms prescribing full-time employment continue to constrain fathers' options for combining work and family. The cultural imperative for men to provide financially (Killewald 2016; Sayer et al. 2011; Townsend 2002), men's lesser involvement in caring for children (Musick et al. 2016; Raley et al. 2012), and the lower social acceptability of part-time work for men (Pedulla 2016) presumably result in less demand for reduced work hours among fathers relative to mothers. In this context, occupational work hour inflexibility may have little bearing on fathers' employment decisions because men feel compelled to work longer hours despite many experiencing work-family conflict and feeling they spend too little time with children (Parker and Wang 2013).

Our research provides further evidence that longer hours and greater rewards for working longer hours contribute to gender inequality in the labor market (Cha and Weeden 2014; Cortés and Pan 2019; Gornick and Meyers 2003). Because the occupational prevalence of 40-plus-hour workweeks and the wage returns to longer hours have gendered consequences, work hour inflexibility increases the employment gap between mothers and fathers. Work hour inflexibility may also contribute to occupational gender segregation, with women disproportionately leaving employment in

occupations in which longer hours are more normative and longer work hours are more highly rewarded. Finally, workplace inflexibility may have implications for work-family conflict and other aspects of individual well-being among those who remain employed but are unable to reduce their hours. Employed mothers experience a significantly higher total workload than employed fathers at the transition to parenthood (Yavorsky et al. 2015). They have maintained high levels of time with children by cutting back on time in leisure, sleep, and personal care (Bianchi 2000).

Results from this study raise important questions for future research on work-family policy, the organization of work, and potential trade-offs between labor force participation and career attainment. Weak work hour regulations and labor market institutions in the United States strongly limit workers' ability to reduce their hours (Berg et al. 2004; Kalleberg 2011; Lyness et al. 2012). In contrast, many European countries have adopted policies to enhance work hour flexibility and facilitate the combination of work and family roles, such as the right to reduce hours to part-time and proportional pay for part-time work (Blau and Kahn 2013; Gornick and Meyers 2003; Hegewisch and Gornick 2008). Whereas our findings suggest that such policies could increase mothers' employment, prior studies have shown that they can simultaneously limit wages and placement in high-level positions (Blau and Kahn 2013; Connolly and Gregory 2010; Glass 2004; Mandel and Semyonov 2005; Pettit and Hook 2009). For example, wage returns to experience are generally lower in part-time versus full-time jobs (Connolly and Gregory 2010; England et al. 2016; Waldfogel 1997). Goldin (2014) suggested that the reorganization of work could potentially limit these types of trade-offs, for example, by making workers more effective substitutes for one another and thus limiting wage penalties to reduced hours.

New parents are making decisions in a labor market and policy context that provides highly constrained choices. Yet studies of specific occupations over time and in cross-national perspective demonstrate that work hour inflexibility is not inevitable or inherent to any particular type of work. Technological and organizational changes have increased work hour flexibility in pharmacy (Goldin 2014), and software engineers' work hours are organized in fundamentally different ways in India, China, and Hungary (Perlow 2001). All-or-nothing occupations with few opportunities for reduced work hour schedules and steep penalties to reduced work hours limit mothers' choices to quitting or working longer hours (Clarkberg and Moen 2001; Goldin 2014). The 40-plus-hour workweek is typical of most occupations in the United States, and wage penalties for reduced hours are pervasive. Work thus continues to be organized primarily around "ideal worker" norms that assume a full-time worker unencumbered by family responsibilities (Acker 1990; Blair-Loy 2003; Kelly et al. 2010; Williams 2000). This study provides evidence that this model limits women's employment following parenthood and suggests that moving toward a dual-earner/dual-caregiver model is likely to require substantial changes in both gendered cultural norms of breadwinning and caregiving and the reorganization of work to support temporal flexibility. ■

**Acknowledgments** This work was supported by grants from the Swedish Research Council and the Eunice Kennedy Shriver National Institute of Child Health and Human Development, National Institutes of Health (R01HD091125). We are grateful for helpful comments and suggestions from participants of the Stockholm University Demography Unit and the University of Texas at Austin Population Research Center Family Demography Workshop, where an earlier version of this paper was presented.

## References

- Acker, J. (1990). Hierarchies, jobs, bodies: A theory of gendered organizations. *Gender & Society, 4*, 139–158.
- Aisenbrey, S., Evertsson, M., & Grunow, D. (2009). Is there a career penalty for mothers' time out? A comparison of Germany, Sweden and the United States. *Social Forces, 88*, 573–605.
- Baxter, J., Hewitt, B., & Haynes, M. (2008). Life course transitions and housework: Marriage, parenthood, and time on housework. *Journal of Marriage and Family, 70*, 259–272.
- Berg, P., Appelbaum, A., Bailey, T., & Kalleberg, A. L. (2004). Contesting time: International comparisons of employee control of working time. *ILR Review, 57*, 331–349.
- Bertrand, M., Goldin, C., & Katz, L. F. (2010). Dynamics of the gender gap for young professionals in the financial and corporate sectors. *American Economic Journal: Applied Economics, 2*(3), 228–255.
- Bianchi, S. M. (2000). Maternal employment and time with children: Dramatic change or surprising continuity? *Demography, 37*, 401–414.
- Blair-Loy, M. (2003). *Competing devotions: Career and family among women executives*. Cambridge, MA: Harvard University Press.
- Blau, F. D., & Kahn, L. M. (2013). Female labor supply: Why is the United States falling behind? *American Economic Review: Papers & Proceedings, 103*, 251–256.
- Blau, F. D., & Kahn, L. M. (2017). The gender wage gap: Extent, trends, and explanations. *Journal of Economic Literature, 55*, 789–865.
- Budig, M. J., & England, P. (2001). The wage penalty for motherhood. *American Sociological Review, 66*, 204–225.
- Byker, T. (2016a). The opt-out continuation: Education, work, and motherhood from 1984 to 2012. *Russel Sage Foundation Journal of the Social Sciences, 2*(4), 34–70.
- Byker, T. S. (2016b). Paid parental leave laws in the United States: Does short-duration leave affect women's labor-force attachment? *American Economic Review: Papers & Proceedings, 106*, 242–246.
- Cha, Y. (2010). Reinforcing separate spheres: The effect of spousal overwork on men's and women's employment in dual-earner households. *American Sociological Review, 75*, 303–329.
- Cha, Y. (2013). Overwork and the persistence of gender segregation in occupations. *Gender & Society, 27*, 158–184.
- Cha, Y., & Weeden, K. A. (2014). Overwork and the slow convergence in the gender gap in wages. *American Sociological Review, 79*, 457–484.
- Clarkberg, M., & Moen, P. (2001). Understanding the time-squeeze: Married couples' preferred and actual work-hour strategies. *American Behavioral Scientist, 44*, 1115–1136.
- Collins, C. (2019). *Making motherhood work: How women manage careers and caregiving*. Princeton, NJ: Princeton University Press.
- Connolly, S., & Gregory, M. (2010). Dual tracks: Part-time work in life-cycle employment for British women. *Journal of Population Economics, 23*, 907–931.
- Correll, S. J., Kelly, E. L., O'Connor, L. T., & Williams, J. C. (2014). Redesigning, redefining work. *Work and Occupations, 41*, 3–17.
- Cortés, P., & Pan, J. (2017). Cross-country evidence on the relationship between overwork and skilled women's job choices. *American Economic Review: Papers & Proceedings, 107*, 105–109.
- Cortés, P., & Pan, J. (2019). When time binds: Substitutes for household production, returns to working long hours, and the skilled gender wage gap. *Journal of Labor Economics, 37*, 351–398.
- Damaske, S., & Frech, A. (2016). Women's work pathways across the life course. *Demography, 53*, 365–391.
- DiPrete, T. A., & Buchmann, C. (2006). Gender-specific trends in the value of education and the emerging gender gap in college completion. *Demography, 43*, 1–24.
- England, P., Bearak, J., Budig, M. J., & Hodges, M. J. (2016). Do highly paid, highly skilled women experience the largest motherhood penalty? *American Sociological Review, 81*, 1161–1189.
- Gangl, M., & Ziefle, A. (2009). Motherhood, labor force behavior, and women's careers: An empirical assessment of the wage penalty for motherhood in Britain, Germany, and the United States. *Demography, 46*, 341–369.
- Gerson, K. (2010). *The unfinished revolution: Coming of age in a new era of gender, work, and family*. Oxford, UK: Oxford University Press.

- Gjerdingen, D. K., & Center, B. A. (2005). First-time parents' postpartum changes in employment, child-care, and housework responsibilities. *Social Science Research, 34*, 103–116.
- Glass, J. (2004). Blessing or curse? Work-family policies and mother's wage growth over time. *Work and Occupations, 31*, 367–394.
- Glass, J., & Camarigg, V. (1992). Gender, parenthood, and job-family compatibility. *American Journal of Sociology, 98*, 131–151.
- Glass, J., Simon, R. W., & Andersson, M. A. (2016). Parenthood and happiness: Effects of work-family reconciliation policies in 22 OECD countries. *American Journal of Sociology, 122*, 886–929.
- Glass, J. L., & Riley, L. (1998). Family responsive policies and employee retention following childbirth. *Social Forces, 76*, 1401–1435.
- Goldin, C. (2006). The quiet revolution that transformed women's employment, education, and family. *American Economic Review: Papers & Proceedings, 96*, 1–21.
- Goldin, C. (2014). A grand gender convergence: Its last chapter. *American Economic Review, 104*, 1091–1119.
- Goldin, C., & Katz, L. F. (2011). The cost of workplace flexibility for high-powered professionals. *Annals of the American Academy of Political and Social Science, 638*, 45–67.
- Goldin, C., & Katz, L. F. (2016). A most egalitarian profession: Pharmacy and the evolution of a family-friendly occupation. *Journal of Labor Economics, 34*, 705–746.
- Gornick, J. C., & Meyers, M. K. (2003). *Families that work: Policies for reconciling parenthood and employment*. New York, NY: Russell Sage Foundation.
- Hays, S. (1997). *The cultural contradictions of motherhood*. New Haven, CT: Yale University Press.
- Hegewisch, A., & Gornick, J. C. (2008). *Statutory routes to workplace flexibility in cross-national perspective* (IWPR report). Washington, DC: Institute for Women's Policy Research.
- Herr, J. L., & Wolfram, C. D. (2012). Work environment and opt-out rates at motherhood across high education career paths. *ILR Review, 65*, 928–950.
- Jacobs, J. A., & Gerson, K. (2004). *The time divide: Work, family, and gender inequality*. Cambridge, MA: Harvard University Press.
- Jacobs, J. A., & Gerson, K. (2016). Unpacking Americans' views on the employment of mothers and fathers using national vignette survey data: SWS presidential address. *Gender & Society, 30*, 413–441.
- Kalleberg, A. L. (2011). *Good jobs, bad jobs: The rise of polarized and precarious employment systems in the United States, 1970s to 2000s*. New York, NY: Russell Sage Foundation.
- Kelly, E. L., Ammons, S. K., Chermack, K., & Moen, P. (2010). Gendered challenge, gendered response: Confronting the ideal worker norm in a white-collar organization. *Gender & Society, 24*, 281–303.
- Kelly, E. L., Moen, P., Oakes, J. M., Fan, W., Okechukwu, C., Davis, K. D., . . . Casper, L. M. (2014). Changing work and work-family conflict: Evidence from the Work, Family, and Health Network. *American Sociological Review, 79*, 485–516.
- Killewald, A. (2013). A reconsideration of the fatherhood premium: Marriage, coresidence, biology, and fathers' wages. *American Sociological Review, 78*, 96–116.
- Killewald, A. (2016). Money, work, and marital stability: Assessing change in the gendered determinants of divorce. *American Sociological Review, 81*, 696–719.
- Killewald, A., & García-Mangano, J. (2016). Tethered lives: A couple-based perspective on the consequences of parenthood for time use, occupation, and wages. *Social Science Research, 60*, 266–282.
- Killewald, A., & Zhou, X. (2019). U.S. mothers' long-term employment patterns. *Demography, 56*, 285–320.
- Kuperberg, A., & Stone, P. (2008). The media depiction of women who opt out. *Gender & Society, 22*, 497–517.
- Kuziemko, I., Pan, J., Shen, J., & Washington, E. (2018). *The mommy effect: Do women anticipate the employment effects of motherhood?* (NBER Working Paper No. 24740). Cambridge, MA: National Bureau of Economic Research.
- Landivar, L. C. (2014). Opting out, scaling back, or business-as-usual? An occupational assessment of women's employment. *Sociological Forum, 29*, 189–214.
- Lu, Y., Wang, J. S.-H., & Han, W.-J. (2017). Women's short-term employment trajectories following birth: Patterns, determinants, and variations by race/ethnicity and nativity. *Demography, 54*, 93–118.
- Lundberg, S., & Rose, E. (2002). The effects of sons and daughters on men's labor supply and wages. *Review of Economics and Statistics, 84*, 251–268.
- Lyness, K. S., Gornick, J. C., Stone, P., & Grotto, A. R. (2012). It's all about control: Worker control over schedules and hours in cross-national context. *American Sociological Review, 77*, 1023–1049.



- Mandel, H., & Semyonov, M. (2005). Family policies, wage structures, and gender gaps: Sources of earnings inequality in 20 countries. *American Sociological Review*, *70*, 949–967.
- Mas, A., & Pallais, A. (2017). Valuing alternative work arrangements. *American Economic Review*, *107*, 3722–3759.
- Mincer, J., & Ofek, H. (1982). Interrupted work careers: Depreciation and restoration of human capital. *Journal of Human Resources*, *17*, 3–24.
- Moen, P., Kelly, E. L., Fan, W., Lee, S.-R., Almeida, D., Kossek, E. E., & Buxton, O. M. (2016). Does a flexibility/support organizational initiative improve high-tech employees' well-being? Evidence from the Work, Family, and Health Network. *American Sociological Review*, *81*, 134–164.
- Moen, P., & Roehling, P. (2005). *The career mystique: Cracks in the American dream*. Oxford, UK: Rowman & Littlefield.
- Musick, K., Bea, M. D., & Gonalons-Pons, P. (2020). His and her earnings following parenthood in the United States, Germany, and the United Kingdom. *American Sociological Review*, *84*, 639–674.
- Musick, K., Meier, A., & Flood, S. (2016). How parents fare: Mothers' and fathers' subjective well-being in time with children. *American Sociological Review*, *81*, 1069–1095.
- Parker, K., & Wang, W. (2013). *Modern parenthood: Roles of moms and dads converge as they balance work and family* (Pew report). Washington, DC: Pew Research Center. Retrieved from <https://www.pewresearch.org/social-trends/2013/03/14/modern-parenthood-roles-of-moms-and-dads-converge-as-they-balance-work-and-family/>
- Patnaik, A. (2019). Reserving time for daddy: The consequences of fathers' quotas. *Journal of Labor Economics*, *37*, 1009–1059.
- Pedulla, D. S. (2016). Penalized or protected? Gender and the consequences of nonstandard and mismatched employment histories. *American Sociological Review*, *81*, 262–289.
- Pedulla, D. S., & Thébaud, S. (2015). Can we finish the revolution? Gender, work-family ideals, and institutional constraint. *American Sociological Review*, *80*, 116–139.
- Perlow, L. A. (2001). Time to coordinate: Toward an understanding of work-time standards and norms in a multicountry study of software engineers. *Work and Occupations* *28*, 91–111.
- Pertold-Gebicka, B., Pertold, F., & Datta Gupta, N. (2016). *Employment adjustments around childbirth* (IZA Discussion Paper No. 9685). Bonn, Germany: Institute for the Study of Labor.
- Pettit, B., & Hook, J. L. (2009). *Gendered tradeoffs: Women, family, and workplace inequality in twenty-one countries*. New York, NY: Russell Sage Foundation.
- Raley, S., Bianchi, S. M., & Wang, W. (2012). When do fathers care? Mothers' economic contribution and fathers' involvement in child care. *American Journal of Sociology*, *117*, 1422–1459.
- Rege, M., & Solli, I. F. (2013). The impact of paternity leave on fathers' future earnings. *Demography*, *50*, 2255–2277.
- Reynolds, J., & Johnson, D. R. (2012). Don't blame the babies: Work hour mismatches and the role of children. *Social Forces*, *91*, 131–155.
- Ridgeway, C. (2011). *Framed by gender: How gender inequality persists in the modern world*. New York, NY: Oxford University Press.
- Sanchez, L., & Thomson, E. (1997). Becoming mothers and fathers: Parenthood, gender, and the division of labor. *Gender & Society*, *11*, 747–772.
- Sayer, L. C., England, P., Allison, P. D., & Kangas, N. (2011). She left, he left: How employment and satisfaction affect women's and men's decisions to leave marriages. *American Journal of Sociology*, *116*, 1982–2018.
- Shafer, E. F. (2011). Wives' relative wages, husbands' paid work hours, and wives' labor-force exit. *Journal of Marriage and Family*, *73*, 250–263.
- Stone, P. (2007). *Opting out? Why women really quit careers and head home*. Berkeley: University of California Press.
- Townsend, N. W. (2002). *The package deal: Marriage, work, and fatherhood in men's lives*. Philadelphia, PA: Temple University Press.
- Turco, C. J. (2010). Cultural foundations of tokenism: Evidence from the leveraged buyout industry. *American Sociological Review*, *75*, 894–913.
- Waldfoegel, J. (1997). The effect of children on women's wages. *American Sociological Review*, *62*, 209–217.
- Webber, G., & Williams, C. (2008). Mothers in 'good' and 'bad' part-time jobs: Different problems, same results. *Gender & Society*, *22*, 752–777.

- Weeden, K. A., Cha, Y., & Bucca, M. (2016). Long work hours, part-time work, and trends in the gender gap in pay, the motherhood wage penalty, and the fatherhood wage premium. *Russell Sage Foundation Journal of the Social Sciences*, 2(4), 71–102.
- Weeden, K. A., & Grusky, D. (2005). The case for a new class map. *American Journal of Sociology*, 111, 141–212.
- Weisshaar, K. (2018). From opt out to blocked out: The challenges for labor market re-entry after family-related employment lapses. *American Sociological Review*, 83, 34–60.
- Williams, J. (2000). *Unbending gender: Why family and work conflict and what to do about it*. New York, NY: Oxford University Press.
- Williams, J. (2010). *Reshaping the work-family debate: Why men and class matter*. Cambridge, MA: Harvard University Press.
- Yavorsky, J. E., Kamp Dush, C. M., & Schoppe–Sullivan, S. J. (2015). The production of inequality: The gender division of labor across the transition to parenthood. *Journal of Marriage and Family*, 77, 662–679.
- Yu, W.-h. (2009). *Gendered trajectories: Women, work, and social change in Japan and Taiwan*. Palo Alto, CA: Stanford University Press.

---

Patrick Ishizuka (corresponding author)  
[ishizuka@wustl.edu](mailto:ishizuka@wustl.edu)

*Ishizuka* • Department of Sociology, Washington University, St. Louis, MO, USA; <https://orcid.org/0000-0002-7780-0976>

*Musick* • Department of Policy Analysis and Management, Cornell University, Ithaca, NY, USA; <https://orcid.org/0000-0003-0329-5134>
